# Supplementary material
Source: PubMed Central journal article supplement (PMC10991350)
Supplement: 262_2021_2996_MOESM2_ESM.pdf [file 262_2021_2996_MOESM2_ESM.pdf]

## Supplementary material 2. Data collection form

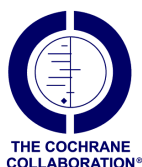

# Data collection form

## Intervention review – RCTs and non-RCTs

|                           |
|---------------------------|
| <b>Review title or ID</b> |
|                           |

|                                                                                                                      |
|----------------------------------------------------------------------------------------------------------------------|
| <b>Study ID</b> ( <i>surname of first author and year first full report of study was published e.g. Smith 2001</i> ) |
|                                                                                                                      |

### General Information

|                                                                        |  |
|------------------------------------------------------------------------|--|
| 1. <b>Date form completed</b> ( <i>dd/mm/yyyy</i> )                    |  |
| 2. <b>Name/ID of person extracting data</b>                            |  |
| 3. <b>Study funding source</b><br>( <i>including role of funders</i> ) |  |

### Eligibility

| Study Characteristics               | Review Inclusion Criteria | Yes/ No / Unclear | Location in text |
|-------------------------------------|---------------------------|-------------------|------------------|
| 4. <b>Type of study</b>             | Randomised trial          |                   |                  |
|                                     | Non-randomised trial      |                   |                  |
| 5. <b>Participants</b>              |                           |                   |                  |
| 6. <b>Types of Exposure</b>         |                           |                   |                  |
| 7. <b>Types of outcome measures</b> |                           |                   |                  |
| 8. <b>Decision:</b>                 |                           |                   |                  |
| 9. <b>Reason for exclusion</b>      |                           |                   |                  |

**DO NOT PROCEED IF STUDY EXCLUDED FROM REVIEW**

### Population and setting

|                                                                                       | <b>Description</b><br><i>Include comparative information for each group (i.e. intervention and controls) if available</i> | <b>Location in text</b><br><i>(pg &amp; ¶/fig/table)</i> |
|---------------------------------------------------------------------------------------|---------------------------------------------------------------------------------------------------------------------------|----------------------------------------------------------|
| 10. <b>Population description</b><br><i>(from which study participants are drawn)</i> |                                                                                                                           |                                                          |
| 11. <b>Setting</b><br><i>(including location and social context)</i>                  |                                                                                                                           |                                                          |
| 12. <b>Inclusion criteria</b>                                                         |                                                                                                                           |                                                          |
| 13. <b>Exclusion criteria</b>                                                         |                                                                                                                           |                                                          |

Data collection form  
Intervention review – RCTs and non-RCTs

Methods

|                                                                       | Descriptions as stated in report/paper | Location in text<br>(pg & ¶/fig/table) |
|-----------------------------------------------------------------------|----------------------------------------|----------------------------------------|
| 14. Aim of study                                                      |                                        |                                        |
| 15. Design<br>(e.g. parallel, crossover, non-RCT)                     |                                        |                                        |
| 16. Start date                                                        |                                        |                                        |
| 17. End date                                                          |                                        |                                        |
| 18. Duration of participation<br>(from recruitment to last follow-up) |                                        |                                        |

Participants

Provide overall data and, if available, comparative data for each intervention or comparison group. Add as many rows as needed

| Demographics                 | Total |   | Group 1 |   | Group 2 |   |
|------------------------------|-------|---|---------|---|---------|---|
|                              | N     | % | N       | % | N       | % |
| Age                          |       |   |         |   |         |   |
| Male                         |       |   |         |   |         |   |
| Female                       |       |   |         |   |         |   |
| Type of cancer               |       |   |         |   |         |   |
| Other important demographics |       |   |         |   |         |   |
| Other treatment              |       |   |         |   |         |   |

Outcomes

Copy and paste table for each outcome.

Outcome 1

|                                                                  | Description as stated in report/paper | Location in text |
|------------------------------------------------------------------|---------------------------------------|------------------|
| 19. Outcome definition<br>(with diagnostic criteria if relevant) |                                       |                  |
| 20. Person measuring/reporting                                   |                                       |                  |
| 21. Is outcome/tool validated?                                   | Yes/No/Unclear                        |                  |

Results

Copy and paste the appropriate table for each outcome, including additional tables for each time point and subgroup as required.

For randomised or non-randomised trial - Dichotomous outcome

|                                                                                                              | Description as stated in report/paper |                  |            |                  | Location in text |
|--------------------------------------------------------------------------------------------------------------|---------------------------------------|------------------|------------|------------------|------------------|
| 22. Comparison                                                                                               |                                       |                  |            |                  |                  |
| 23. Outcome                                                                                                  |                                       |                  |            |                  |                  |
| 24. Subgroup                                                                                                 |                                       |                  |            |                  |                  |
| 25. Results<br>Note whether: post-intervention OR change from baseline<br>And whether Adjusted OR Unadjusted | Intervention                          |                  | Comparison |                  |                  |
|                                                                                                              | No. events                            | No. participants | No. events | No. participants |                  |
|                                                                                                              |                                       |                  |            |                  |                  |
| 26. Baseline data                                                                                            | Intervention                          |                  | Comparison |                  |                  |

Data collection form

Intervention review – RCTs and non-RCTs

|                                                                          | Description as stated in report/paper |                  |            |                  | Location in text |
|--------------------------------------------------------------------------|---------------------------------------|------------------|------------|------------------|------------------|
|                                                                          | No. events                            | No. participants | No. events | No. participants |                  |
|                                                                          |                                       |                  |            |                  |                  |
| <b>27. Statistical methods used and appropriateness of these methods</b> |                                       |                  |            |                  |                  |

Other information

|                                             | Description as stated in report/paper | Location in text |
|---------------------------------------------|---------------------------------------|------------------|
| <b>28. Key conclusions of study authors</b> |                                       |                  |
