# Supplementary material
Source: PubMed Central journal article supplement (PMC10991350)
Supplement: 262_2021_2996_MOESM3_ESM.pdf [file 262_2021_2996_MOESM3_ESM.pdf]

### Supplementary material 3

### Supplementary Figure 1. Flowchart of study selection and design

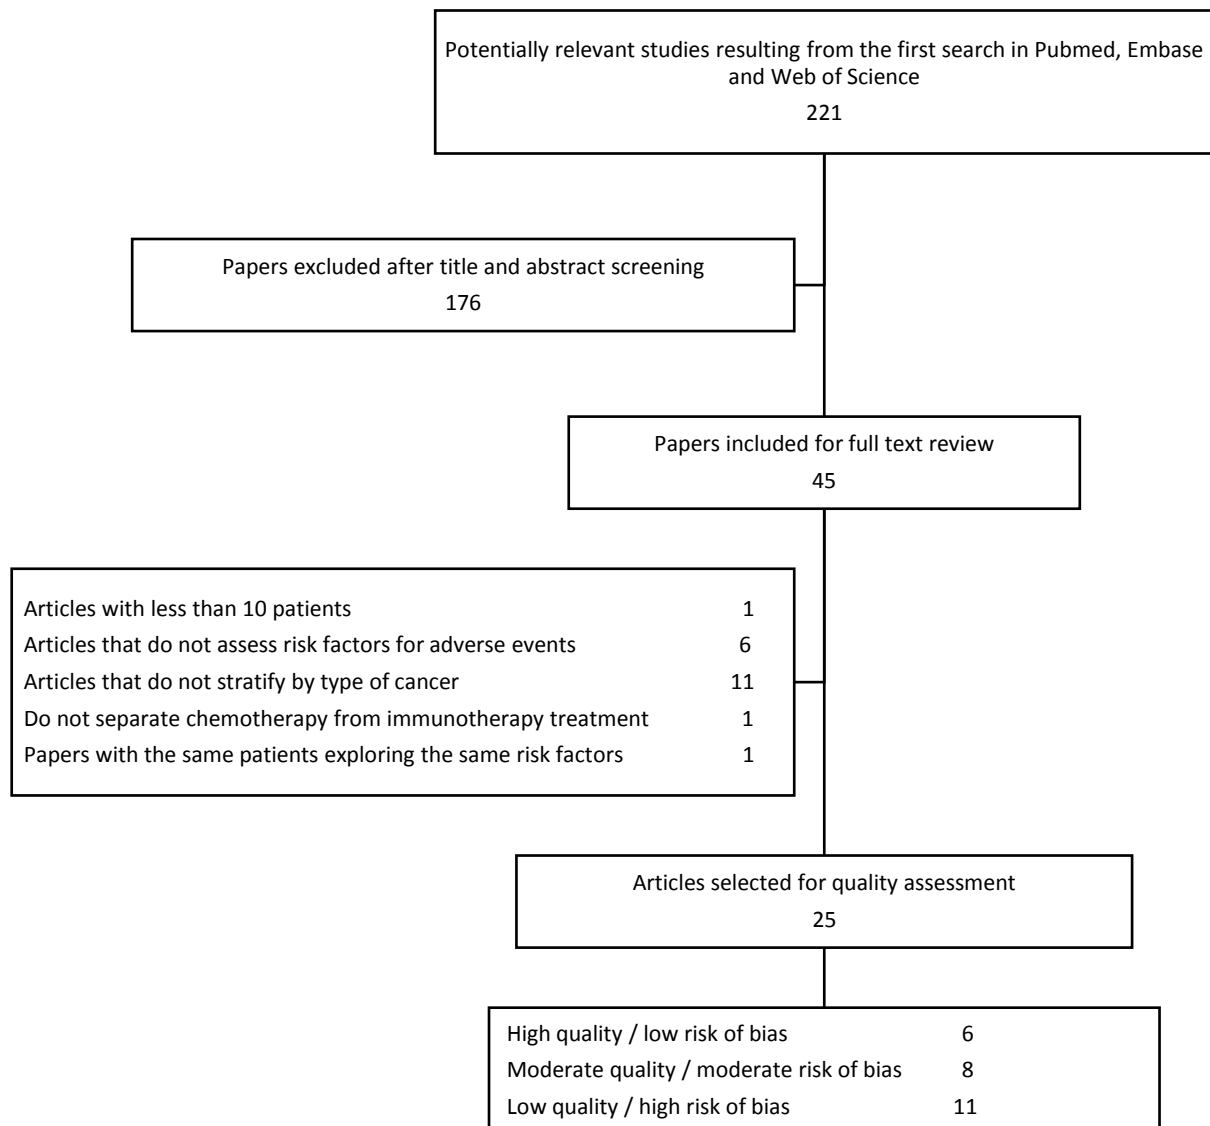

**Supplementary Figure 2. QUIPS Quality assessment of the studies included to the meta-analysis.**

|                   | 1. Study Participation | 2. Study Attrition | 3. Prognostic factor measurement | 4. Outcome Measurement | 5. Study Confounding | 6. Statistical analysis and reporting | Overall evaluation |
|-------------------|------------------------|--------------------|----------------------------------|------------------------|----------------------|---------------------------------------|--------------------|
| Ahmed 2020        | L                      | M                  | L                                | M                      | H                    | M                                     | H                  |
| Aso 2020          | L                      | M                  | L                                | L                      | H                    | M                                     | M                  |
| Chu 2020          | L                      | M                  | L                                | L                      | L                    | L                                     | L                  |
| Cortellini 2020   | L                      | M                  | M                                | L                      | H                    | H                                     | H                  |
| Duma 2019         | L                      | M                  | L                                | L                      | L                    | L                                     | L                  |
| Fujita 2019       | L                      | M                  | M                                | L                      | H                    | L                                     | M                  |
| Fukihara 2019     | L                      | M                  | M                                | L                      | L                    | L                                     | L                  |
| Kichenadasse 2020 | L                      | M                  | M                                | L                      | M                    | H                                     | H                  |
| Koyama 2019       | L                      | M                  | L                                | L                      | L                    | L                                     | L                  |
| Metro 2020        | L                      | M                  | L                                | M                      | H                    | M                                     | H                  |
| Moey 2020         | L                      | M                  | M                                | L                      | H                    | H                                     | H                  |
| Nakahama 2018     | L                      | H                  | L                                | M                      | L                    | L                                     | M                  |
| Nakanishi 2019    | L                      | H                  | L                                | L                      | L                    | L                                     | M                  |
| Nishiyama 2019    | L                      | M                  | M                                | M                      | H                    | H                                     | H                  |
| Okada 2020        | L                      | M                  | L                                | L                      | L                    | L                                     | L                  |
| Owen 2018         | L                      | M                  | L                                | L                      | H                    | H                                     | H                  |
| Sakata 2019       | L                      | M                  | L                                | L                      | M                    | H                                     | H                  |
| Shankar 2020      | L                      | M                  | L                                | L                      | H                    | H                                     | H                  |
| Sugano 2020       | L                      | M                  | L                                | L                      | M                    | L                                     | M                  |
| Suresh 2018       | L                      | M                  | L                                | L                      | L                    | L                                     | L                  |
| Suzuki 2020       | M                      | M                  | L                                | L                      | M                    | L                                     | M                  |
| Toi 2019          | L                      | M                  | L                                | L                      | M                    | H                                     | H                  |
| Watanabe 2020     | L                      | M                  | L                                | L                      | H                    | M                                     | M                  |
| Yamaguchi 2018    | L                      | M                  | L                                | L                      | M                    | L                                     | M                  |
| Zeng 2020         | L                      | M                  | L                                | L                      | H                    | H                                     | H                  |

Green/L (low risk of bias), yellow/M (moderate risk of bias), red/H (high risk of bias)

**Supplementary Table 1. Classification of crude and adjusted odds ratios reflecting the association between risk factors and irAEs in patients treated with ICIs per publication.**

| Author/Year     | Risk factor                     | Type of irAE                                    | OR                 | LCI        | UCI        | p Value    | Analysis |
|-----------------|---------------------------------|-------------------------------------------------|--------------------|------------|------------|------------|----------|
| Fukihara 2019   | Abnormal CT findings            | Pneumonitis                                     | 1.53               | 0.669      | 3.5        | 0.313      | Crude    |
| Nakanishi 2019  |                                 | ILD                                             | 0.725              | 0.225      | 2.334      | 0.585      | Crude    |
| Ahmed 2020      | Age<br>(≥ 65 vs <65 years old)  | irAEs                                           | 2.155462           | 0.994621   | 4.671143   | 0.0636     | Crude    |
| Chu 2020        |                                 | Pneumonitis                                     | 1.417              | 0.789      | 2.746      | 0.225      | Adjusted |
| Cortellini 2020 |                                 | irAEs                                           | 1.041              | 0.800      | 1.353      | 0.789      | Crude    |
| Fujita 2019     |                                 | Infection diseases                              | 1.53               | 0.48       | 5.47       | 0.48       | Adjusted |
| Koyama 2019     |                                 | immune-related thyroid dysfunction              | 0.23               | 0.03       | 1.86       | 0.168      | Adjusted |
| Nishiyama 2019  |                                 | Acute exacerbation of Interstitial lung disease | 0.75187            | 0.082644   | 6.6666     | 0.8        | Adjusted |
| Sakata 2019     |                                 | Severe irAEs                                    | 0.676923           | 0.114453   | 4.00361    | 1          | Crude    |
| Sugano 2020     |                                 | ILD                                             | 0.223714           | 0.044053   | 1.136364   | 0.07       | Adjusted |
| Suresh 2018     |                                 | Pneumonitis                                     | 1                  | 1          | 1          | 0.69       | Crude    |
| Yamaguchi 2018  |                                 | Pneumonitis                                     | 2.15               | 0.71       | 8.01       | 0.18       | Crude    |
| Fukihara 2019   | Age (years)                     | Pneumonitis                                     | 0.98               | 0.939      | 1.023      | 0.347      | Crude    |
| Nakanishi 2019  |                                 | ILD                                             | 1.003              | 0.949      | 1.068      | 0.919      | Crude    |
| Fukihara 2019   | Albumin                         | Pneumonitis                                     | 0.381              | 0.179      | 0.808      | 0.012      | Adjusted |
| Owen 2018       | ALI                             | irAEs                                           | 2.042857           | 0.8128516  | 5.134105   | 0.1547     | Crude    |
| Fujita 2019     | ALK gene                        | Infection diseases                              | 1.2                | 0.77       | 5.85       | 0.56       | Adjusted |
| Fukihara 2019   | ALT                             | Pneumonitis                                     | 1.017              | 0.992      | 1.041      | 0.185      | Crude    |
| Fukihara 2019   | AST                             | Pneumonitis                                     | 0.987              | 0.949      | 1.028      | 0.538      | Crude    |
| Fujita 2019     | Asthma                          | Infection diseases                              | 4.322581           | 0.2630676  | 71.02625   | 0.3474     | Crude    |
| Suzuki 2020     |                                 | ILD                                             | 0.620596206        | 0.03217908 | 11.9686332 | 0.76484552 | Crude    |
| Suzuki 2020     | Best supportive care after ICIs | ILD                                             | 0.8918919          | 0.3383415  | 2.351089   | 0.8082     | Crude    |
| Moey 2020       | Black ethnicity                 | Inhibitor-Related Cardiotoxicity                | 0.4503367          | 0.1596178  | 1.270555   | 0.1664     | Crude    |
| Suresh 2018     |                                 | Pneumonitis                                     | 1.08               | 0.37       | 2.72       | 0.87       | Crude    |
| Metro 2020      | Brain metastasis                | irAEs                                           | 1.05913            | 0.409498   | 2.739347   | 1          | Crude    |
| Fujita 2019     | Bronchiectasis                  | Infection diseases                              | 0.5615764          | 0.1566791  | 2.012827   | 0.575      | Crude    |
| Zeng 2020       | Charlson comorbidity index      | irAEs                                           | 1.555555659        | 4.47995957 | 0.54012829 | 0.431      | Crude    |
| Shankar 2020    | Combination ICI treatment       | irAEs                                           | 0.8148148          | 0.3476475  | 1.909759   | 0.8336     | Crude    |
| Moey 2020       | Concomitant irAEs               | Inhibitor-Related Cardiotoxicity                | 0.0582524          | 0.0174364  | 0.1946124  | 0          | Crude    |
| Fujita 2019     | COPD                            | Infection diseases                              | 1.425              | 0.6368462  | 3.188564   | 0.4016     | Crude    |
| Fukihara 2019   |                                 | Pneumonitis                                     | 1.837798           | 0.800669   | 4.218346   | 0.18923    | Crude    |
| Moey 2020       |                                 | Inhibitor-Related Cardiotoxicity                | 1.68306            | 0.7012057  | 4.039744   | 0.2565     | Crude    |
| Nakanishi 2019  |                                 | ILD                                             | 0.977              | 0.275      | 3.161      | 0.971      | Crude    |
| Okada 2020      |                                 | ILD                                             | 2.657143           | 0.9509449  | 7.424624   | 0.0913     | Crude    |
| Suzuki 2020     |                                 | ILD                                             | 0.5828571          | 0.2093999  | 1.622362   | 0.3354     | Crude    |
| Fujita 2019     |                                 | Corticosteroids during/after nivolumab          | Infection diseases | 1.374863   | 0.63491    | 2.977193   | 0.437459 |
| Fukihara 2019   | Creatinine                      | Pneumonitis                                     | 1.356              | 0.414      | 4.445      | 0.615      | Crude    |
| Yamaguchi 2018  | CRP (≥1mg vs <1mg)              | Pneumonitis                                     | 0.67               | 0.23       | 1.85       | 0.44       | Crude    |
| Nakahama 2018   | CRP (3mg vs >3mg)               | ILD                                             | 0.95               | 0.3        | 2.95       | 0.925      | Adjusted |

|                   |                                      |                                                 |                    |           |           |          |          |       |
|-------------------|--------------------------------------|-------------------------------------------------|--------------------|-----------|-----------|----------|----------|-------|
| Fukihara 2019     | CRP (mg/dl)                          | Pneumonitis                                     | 1.09               | 0.993     | 1.197     | 0.071    | Crude    |       |
| Nakanishi 2019    |                                      | ILD                                             | 1.06826            | 0.96172   | 1.1866    | 0.236    | Crude    |       |
| Fujita 2019       | Diabetes                             | Infection diseases                              | 3.61               | 1.14      | 11.4      | 0.028    | Adjusted |       |
| Moey 2020         |                                      | Inhibitor-Related Cardiotoxicity                | 1.28267            | 0.4951607 | 3.322645  | 0.6172   | Crude    |       |
| Suzuki 2020       |                                      | ILD                                             | 0.8253968          | 0.1727878 | 3.942871  | 1        | Crude    |       |
| Suzuki 2020       | Digestive ulcer                      | ILD                                             | 2.074074           | 0.3881364 | 11.08318  | 0.3268   | Crude    |       |
| Nakanishi 2019    | Driver mutation                      | ILD                                             | 0.454              | 0.024     | 2.699     | 0.43     | Crude    |       |
| Fujita 2019       | EGFR mutation                        | Infection diseases                              | 0.572391           | 0.203977  | 1.606212  | 0.353521 | Crude    |       |
| Koyama 2019       | EGFR/ALK positive                    | immune-related thyroid dysfunction              | 0.43               | 0.05      | 3.47      | 0.426    | Crude    |       |
| Yamaguchi 2018    | Emphysema score                      | Pneumonitis                                     | 0.68               | 0.16      | 2.73      | 0.58     | Adjusted |       |
| Chu 2020          | Eosinophil count                     | Pneumonitis                                     | 3.518              | 1.851     | 6.686     | 0.001    | Adjusted |       |
| Yamaguchi 2018    | Fibrosis                             | Pneumonitis                                     | 9.53               | 2.47      | 44.79     | 0.0008   | Adjusted |       |
| Nakanishi 2019    | Ground glass attenuation             | ILD                                             | 44.04              | 5.83      | 997.528   | 0.001    | Adjusted |       |
| Nishiyama 2019    |                                      | Acute exacerbation of Interstitial lung disease | 653                | 4.3       | 99000     | 0.01     | Adjusted |       |
| Suzuki 2020       | Hepatic disease                      | ILD                                             | 1.189474           | 0.1316201 | 10.74948  | 1        | Crude    |       |
| Aso 2020          | Histology (Squamous vs non-squamous) | skin reactions                                  | 1.121528           | 0.5587607 | 2.251097  | 0.8584   | Crude    |       |
| Chu 2020          |                                      | Pneumonitis                                     | 1.430              | 0.759     | 2.693     | 0.3113   | Crude    |       |
| Cortellini 2020   |                                      | irAEs                                           | 0.882              | 0.647     | 1.202     | 0.4368   | Crude    |       |
| Fujita 2019       |                                      | Infection diseases                              | 0.865455           | 0.343016  | 2.183603  | 0.822459 | Crude    |       |
| Fukihara 2019     |                                      | Pneumonitis                                     | 0.76               | 0.311     | 1.857     | 0.547    | Crude    |       |
| Kichenadasse 2020 |                                      | irAEs                                           | 0.8124363          | 0.6297399 | 1.048136  | 0.1129   | Crude    |       |
| Koyama 2019       |                                      | immune-related thyroid dysfunction              | 0.52               | 0.14      | 1.91      | 0.323    | Crude    |       |
| Nakahama 2018     |                                      | ILD                                             | 1.28               | 0.44      | 3.78      | 0.648    | Adjusted |       |
| Nakanishi 2019    |                                      | ILD                                             | 1.609              | 0.323     | 6.327     | 0.529    | Crude    |       |
| Okada 2020        |                                      | ILD                                             | 1.923077           | 0.5907563 | 6.260153  | 0.3184   | Crude    |       |
| Sakata 2019       |                                      | Severe irAEs                                    | 6.25               | 1.03691   | 37.67204  | 0.0772   | Crude    |       |
| Shankar 2020      |                                      | irAEs                                           | 0.7762647          | 0.5256311 | 1.146407  | 0.2087   | Crude    |       |
| Sugano 2020       |                                      | ILD                                             | 1.234568           | 0.3508772 | 4.347826  | 0.75     | Adjusted |       |
| Suzuki 2020       |                                      | ILD                                             | 0.2484994          | 0.0690348 | 0.8945047 | 0.0256   | Crude    |       |
| Watanabe 2020     |                                      | ILD                                             | 2.276786           | 1.080531  | 4.797413  | 0.0314   | Crude    |       |
| Yamaguchi 2018    |                                      |                                                 | Pneumonitis        | 2         | 0.63      | 5.81     | 0.23     | Crude |
| Fujita 2019       |                                      | History of thoracic surgery                     | Infection diseases | 0.9230769 | 0.3454827 | 2.46632  | 1        | Crude |
| Nakanishi 2019    | Honeycombing in CT                   | ILD                                             | 1.932              | 0.037     | 83.463    | 0.729    | Adjusted |       |
| Moey 2020         | Hyperlipidemia                       | Inhibitor-Related Cardiotoxicity                | 0.4398496          | 0.1429029 | 1.35384   | 0.2271   | Crude    |       |
| Moey 2020         | Hypertension                         | Inhibitor-Related Cardiotoxicity                | 0.6093366          | 0.2539677 | 1.461962  | 0.3585   | Crude    |       |
| Suzuki 2020       |                                      | ILD                                             | 0.3441176          | 0.0951813 | 1.24412   | 0.1191   | Crude    |       |
| Fujita 2019       | Hypothyroidism                       | Infection diseases                              | 0.5898618          | 0.0699781 | 4.97208   | 1        | Crude    |       |
| Nakahama 2018     | IAOT                                 | ILD                                             | 6.59               | 1.82      | 23.9      | 0.004    | Adjusted |       |
| Fujita 2019       | ILD                                  | Infection diseases                              | 0.5120968          | 0.0617382 | 4.247662  | 1        | Crude    |       |
| Fukihara 2019     |                                      | Pneumonitis                                     | 1.898551           | 0.563179  | 6.400268  | 0.288898 | Crude    |       |
| Okada 2020        |                                      | ILD                                             | 0.78               | 0.14      | 4.24      | 0.77     | Adjusted |       |
| Okada 2020        |                                      | Severe irAEs                                    | 0.72               | 0.075     | 6.88      | 0.77     | Adjusted |       |
| Nakanishi 2019    | KL-6                                 | ILD                                             | 0.99975            | 0.9986    | 1.0001    | 0.297    | Crude    |       |
| Owen 2018         | KRAS mutation                        | irAEs                                           | 0.3320158          | 0.1019756 | 1.080989  | 0.0766   | Crude    |       |
| Kichenadasse 2020 | LDH                                  | irAEs                                           | 0.811978           | 0.641261  | 1.028143  | 0.085    | Crude    |       |

|                   |                                                       |                                                 |             |            |            |            |          |
|-------------------|-------------------------------------------------------|-------------------------------------------------|-------------|------------|------------|------------|----------|
| Nakahama 2018     |                                                       | ILD                                             | 2.1         | 0.81       | 5.38       | 0.126      | Adjusted |
| Nakanishi 2019    |                                                       | ILD                                             | 0.99987     | 0.99908    | 1.0007     | 0.659      | Crude    |
| Yamaguchi 2018    |                                                       | Pneumonitis                                     | 0.45        | 0.12       | 1.34       | 0.16       | Crude    |
| Kichenadasse 2020 | Lung immune prognostic index                          | irAEs                                           | 1.650946    | 1.119867   | 2.433882   | 0.0098     | Crude    |
| Nakanishi 2019    | Lymphocyte                                            | ILD                                             | 0.99933     | 0.99834    | 1.0003     | 0.17       | Crude    |
| Nakanishi 2019    | Neutrophil count                                      | ILD                                             | 1.00003     | 0.99999    | 1.0001     | 0.125      | Crude    |
| Fukihara 2019     | NLR                                                   | Pneumonitis                                     | 1.06        | 0.993      | 1.131      | 0.08       | Crude    |
| Nakanishi 2019    |                                                       | ILD                                             | 1.03783     | 0.99754    | 1.1014     | 0.066      | Crude    |
| Owen 2018         |                                                       | irAEs                                           | 1.035714    | 0.4191255  | 2.559386   | 1          | Crude    |
| Fujita 2019       | No. Cycles                                            | Infection diseases                              | 1.76        | 0.6        | 5.53       | 0.31       | Adjusted |
| Shankar 2020      | Non-white ethnicity                                   | irAEs                                           | 1.072435    | 0.7228447  | 1.591099   | 0.7616     | Crude    |
| Cortellini 2020   | Number of organs affected                             | irAEs                                           | 0.553       | 0.424      | 0.721      | 0.0001     | Crude    |
| Suresh 2018       | Other treatments                                      | Pneumonitis                                     | 0.19        | 0.01       | 1          | 0.11       | Crude    |
| Moey 2020         | PD-(L)1 Agent                                         | Inhibitor-Related Cardiotoxicity                | 3.346749226 | 0.1908319  | 58.6942251 | 0.41606877 | Crude    |
| Okada 2020        | (PD-1 vs PD-L1 inhibitors)                            | ILD                                             | 4.636364    | 0.5774652  | 37.22453   | 0.1827     | Crude    |
| Shankar 2020      |                                                       | irAEs                                           | 2.035623    | 0.8188542  | 5.06044    | 0.1628     | Crude    |
| Nakanishi 2019    | PD-L1 expression (≥1%/<1%)                            | ILD                                             | 0.686       | 0.065      | 7.235      | 0.754      | Crude    |
| Okada 2020        | PD-L1 expression (≥50% vs. <50%)                      | ILD                                             | 1.596059    | 0.53013    | 4.805245   | 0.4195     | Crude    |
| Sakata 2019       |                                                       | Severe irAEs                                    | 2.8         | 0.488907   | 16.035754  | 0.431511   | Crude    |
| Suzuki 2020       |                                                       | ILD                                             | 2.113095    | 0.6426302  | 6.948275   | 0.3024     | Crude    |
| Watanabe 2020     |                                                       | ILD                                             | 2.26087     | 0.4463522  | 11.45179   | 0.4816     | Crude    |
| Kichenadasse 2020 | PD-L1 expression (positive vs. negative)              | irAEs                                           | 0.9963412   | 0.7871292  | 1.26116    | 1          | Crude    |
| Koyama 2019       |                                                       | immune-related thyroid dysfunction              | 0.99        | 0.33       | 2.98       | 0.983      | Crude    |
| Fukihara 2019     | Pembrolizumab treatment (Pembrolizumab vs other ICIs) | Pneumonitis                                     | 3.259       | 1.361      | 7.807      | 0.008      | Adjusted |
| Sakata 2019       |                                                       | Severe irAEs                                    | 3.2         | 0.731794   | 13.993012  | 0.180373   | Crude    |
| Suresh 2018       |                                                       | Pneumonitis                                     | 0.344916    | 0.077318   | 1.538675   | 0.175965   | Crude    |
| Watanabe 2020     |                                                       | ILD                                             | 1.028085    | 0.4346893  | 2.431527   | 1          | Crude    |
| Ahmed 2020        | Performance status (≥2 vs 0-1)                        | irAEs                                           | 0.9161491   | 0.4247466  | 1.97607    | 0.8465     | Crude    |
| Aso 2020          |                                                       | Skin reactions                                  | 0.4803922   | 0.06571    | 3.512045   | 0.5985     | Crude    |
| Chu 2020          |                                                       | Pneumonitis                                     | 2.427184466 | 0.55157198 | 10.6382979 | 0.241      | Crude    |
| Cortellini 2020   |                                                       | irAEs                                           | 2.02963     | 1.35978    | 3.0846     | 0.0003     | Crude    |
| Fujita 2019       |                                                       | Infection diseases                              | 0.4975418   | 0.203137   | 1.218625   | 0.1336     | Crude    |
| Fukihara 2019     |                                                       | Pneumonitis                                     | 0.569       | 0.205      | 1.583      | 0.28       | Crude    |
| Kichenadasse 2020 |                                                       | irAEs                                           | 0.880726705 | 0.1770669  | 4.38071382 | 1          | Crude    |
| Koyama 2019       |                                                       | immune-related thyroid dysfunction              | 1.960784314 | 0.41666667 | 9.09090909 | 0.399      | Crude    |
| Nakahama 2018     |                                                       | ILD                                             | 1.587301587 | 0.45248869 | 5.55555556 | 0.471      | Adjusted |
| Nakanishi 2019    |                                                       | ILD                                             | 1.017       | 0.229      | 7.159      | 0.984      | Crude    |
| Nishiyama 2019    |                                                       | Acute exacerbation of Interstitial lung disease | 1.028571    | 0.104442   | 10.129603  | 1          | Crude    |
| Okada 2020        |                                                       | ILD                                             | 0.290697674 | 0.08474576 | 0.99009901 | 0.048      | Adjusted |
| Sakata 2019       |                                                       | Severe irAEs                                    | 0.25        | 0.0207053  | 3.018549   | 0.2866     | Crude    |
| Shankar 2020      |                                                       | irAEs                                           | 1.717402    | 1.049713   | 2.809786   | 0.0371     | Crude    |
| Sugano 2020       |                                                       | ILD                                             | 0.77        | 0.2        | 2.92       | 0.7        | Adjusted |
| Suzuki 2020       |                                                       | ILD                                             | 0.840708    | 0.0930277  | 7.597627   | 1          | Crude    |

|                   |                                                 |                                  |                    |            |           |            |          |       |
|-------------------|-------------------------------------------------|----------------------------------|--------------------|------------|-----------|------------|----------|-------|
| Watanabe 2020     |                                                 | ILD                              | 0.7985803          | 0.320584   | 1.989278  | 0.6285     | Crude    |       |
| Yamaguchi 2018    |                                                 | Pneumonitis                      | 2.631579           | 0.4739337  | 50        | 0.31       | Crude    |       |
| Nakahama 2018     | Pleural effusion                                | ILD                              | 0.77               | 0.3        | 1.98      | 0.587      | Adjusted |       |
| Owen 2018         | PLR                                             | irAEs                            | 0.7058824          | 0.2858391  | 1.743183  | 0.4971     | Crude    |       |
| Aso 2020          | Pre-existing anti-nuclear antibodies            | skin reactions                   | 1.96195            | 0.9737474  | 3.953025  | 0.0696     | Crude    |       |
| Chu 2020          |                                                 | Pneumonitis                      | 0.902              | 0.329      | 2.474     | 0.841      | Crude    |       |
| Aso 2020          | Pre-existing anti-thyroid antibodies            | skin reactions                   | 2.029825           | 0.8814161  | 4.674509  | 0.1196     | Crude    |       |
| Toi 2019          | Pre-existing auto antibodies                    | irAEs                            | 3.25               | 1.589025   | 6.647157  | 0.0017     | Crude    |       |
| Aso 2020          | Pre-existing rheumatoid factor                  | skin reactions                   | 3.41               | 1.58       | 7.36      | 0.002      | Adjusted |       |
| Moey 2020         | Previous atrial fibrillation/flutter            | Inhibitor-Related Cardiotoxicity | 2.390977           | 0.7138688  | 8.008157  | 0.2376     | Crude    |       |
| Moey 2020         | Previous cardiovascular disease                 | Inhibitor-Related Cardiotoxicity | 2.883951           | 1.113954   | 7.466349  | 0.0385     | Crude    |       |
| Suzuki 2020       |                                                 | ILD                              | 0.281129653        | 0.01573833 | 5.0217459 | 0.39523904 | Crude    |       |
| Moey 2020         | Previous cerebrovascular disease                | Inhibitor-Related Cardiotoxicity | 1.1475             | 0.3127615  | 4.210096  | 0.7379     | Crude    |       |
| Suzuki 2020       |                                                 | ILD                              | 0.281129653        | 0.01573833 | 5.0217459 | 0.39523904 | Crude    |       |
| Moey 2020         | Previous chronic kidney disease                 | Inhibitor-Related Cardiotoxicity | 0.8282828          | 0.1000817  | 6.854923  | 1          | Crude    |       |
| Sugano 2020       | Previous interstitial pneumonia                 | ILD                              | 14.7               | 2.16       | 99.6      | 0.006      | Adjusted |       |
| Nakahama 2018     | Previous radiation pneumonitis                  | ILD                              | 3.96               | 1.35       | 11.6      | 0.012      | Adjusted |       |
| Nakanishi 2019    |                                                 | ILD                              | 0.331              | 0.017      | 1.907     | 0.246      | Crude    |       |
| Nakahama 2018     | Pulmonary metastasis                            | ILD                              | 0.89               | 0.33       | 2.41      | 0.821      | Adjusted |       |
| Fujita 2019       | Radiotherapy before treatment                   | Infection diseases               | 1.200929           | 0.5307692  | 2.717247  | 0.6749     | Crude    |       |
| Fukihara 2019     |                                                 | Pneumonitis                      | 0.888              | 0.362      | 2.178     | 0.795      | Crude    |       |
| Moey 2020         |                                                 | Inhibitor-Related Cardiotoxicity | 1.005128           | 0.4179406  | 2.417288  | 1          | Crude    |       |
| Nakanishi 2019    |                                                 | ILD                              | 0.622              | 0.158      | 2.069     | 0.449      | Crude    |       |
| Okada 2020        |                                                 | ILD                              | 1.521739           | 0.5331625  | 4.34331   | 0.4192     | Crude    |       |
| Owen 2018         |                                                 | irAEs                            | 0.926316           | 0.347419   | 2.469819  | 1          | Crude    |       |
| Sugano 2020       |                                                 | ILD                              | 1.26               | 0.33       | 4.82      | 0.73       | Adjusted |       |
| Nakanishi 2019    |                                                 | Reticular shadow                 | ILD                | 2.863      | 0.543     | 12.699     | 0.198    | Crude |
| Fujita 2019       |                                                 | Rheumatoid arthritis             | Infection diseases | 1.056452   | 0.114054  | 9.785615   | 1        | Crude |
| Aso 2020          |                                                 | Sex (Male vs female)             | skin reactions     | 1.804444   | 0.7806822 | 4.170736   | 0.2328   | Crude |
| Chu 2020          | Pneumonitis                                     |                                  | 0.499              | 0.197      | 1.263     | 0.142      | Adjusted |       |
| Cortellini 2020   | irAEs                                           |                                  | 0.907              | 0.689      | 1.194     | 0.5257     | Crude    |       |
| Duma 2019         | irAEs                                           |                                  | 0.4901961          | 0.2849003  | 0.8403361 | 0.008      | Adjusted |       |
| Fujita 2019       | Infection diseases                              |                                  | 1.907468           | 0.7679182  | 4.738047  | 0.208121   | Crude    |       |
| Fukihara 2019     | Pneumonitis                                     |                                  | 1.034              | 0.405      | 2.64      | 0.944      | Crude    |       |
| Kichenadasse 2020 | irAEs                                           |                                  | 1.094691           | 0.8701623  | 1.377154  | 0.4492     | Crude    |       |
| Koyama 2019       | immune-related thyroid dysfunction              |                                  | 0.71               | 0.25       | 2.05      | 0.532      | Crude    |       |
| Moey 2020         | Inhibitor-Related Cardiotoxicity                |                                  | 1.401515           | 0.5644869  | 3.479699  | 0.5083     | Crude    |       |
| Nakahama 2018     | ILD                                             |                                  | 1.98               | 0.55       | 7.07      | 0.296      | Adjusted |       |
| Nakanishi 2019    | ILD                                             |                                  | 1.094              | 0.324      | 4.344     | 0.889      | Crude    |       |
| Nishiyama 2019    | Acute exacerbation of Interstitial lung disease |                                  | 1.454545           | 0.1527713  | 13.84882  | 1          | Crude    |       |
| Okada 2020        | ILD                                             |                                  | 3.258333           | 0.6971344  | 15.22911  | 0.1468     | Crude    |       |

|                   |                                                          |                                                 |                    |            |            |          |          |
|-------------------|----------------------------------------------------------|-------------------------------------------------|--------------------|------------|------------|----------|----------|
| Sakata 2019       |                                                          | Severe irAEs                                    | 1.142857           | 0.2409135  | 5.421541   | 1        | Crude    |
| Shankar 2020      |                                                          | irAEs                                           | 1.062651           | 0.7550337  | 1.495597   | 0.7942   | Crude    |
| Sugano 2020       |                                                          | ILD                                             | 3.06               | 0.69       | 13.6       | 0.14     | Adjusted |
| Suzuki 2020       |                                                          | ILD                                             | 5.107527           | 0.6517645  | 40.02493   | 0.1223   | Crude    |
| Watanabe 2020     |                                                          | ILD                                             | 1.188571           | 0.4853493  | 2.910691   | 0.8271   | Crude    |
| Yamaguchi 2018    |                                                          | Pneumonitis                                     | 1.724138           | 0.3355705  | 12.65823   | 0.53     | Adjusted |
| Duma 2019         |                                                          | Severe irAEs                                    | 0.6486486          | 0.3031091  | 1.388098   | 0.3448   | Crude    |
| Zeng 2020         | Simplified comorbidity score                             | irAEs                                           | 0.837606523        | 2.4990285  | 0.28074321 | 0.7899   | Crude    |
| Fukihara 2019     | Smoking<br>(pack-years)                                  | Pneumonitis                                     | 0.994              | 0.981      | 1.007      | 0.362    | Crude    |
| Nishiyama 2019    |                                                          | Acute exacerbation of Interstitial lung disease | 1.5                | 0.15       | 14.9       | 0.73     | Adjusted |
| Okada 2020        |                                                          | ILD                                             | 3.01               | 1.04       | 8.72       | 0.042    | Adjusted |
| Okada 2020        |                                                          | Severe irAEs                                    | 3.65               | 0.85       | 15.57      | 0.084    | Adjusted |
| Aso 2020          | Smoking status<br>(Current/former vs Never)              | Skin reactions                                  | 1.89759            | 0.7142208  | 5.041647   | 0.2607   | Crude    |
| Chu 2020          |                                                          | Pneumonitis                                     | 1.438              | 0.794      | 2.607      | 0.231    | Crude    |
| Fujita 2019       |                                                          | Infection diseases                              | 2.038776           | 0.730449   | 5.69048    | 0.256161 | Crude    |
| Kichenadasse 2020 |                                                          | irAEs                                           | 1.120401           | 0.8303349  | 1.511799   | 0.4993   | Crude    |
| Koyama 2019       |                                                          | immune-related thyroid dysfunction              | 0.88               | 0.29       | 2.66       | 0.82     | Crude    |
| Nakahama 2018     |                                                          | ILD                                             | 1.24               | 0.27       | 5.69       | 0.778    | Adjusted |
| Nakanishi 2019    |                                                          | ILD                                             | 3.925              | 0.696      | 73.997     | 0.136    | Crude    |
| Sakata 2019       |                                                          | Severe irAEs                                    | 1.477273           | 0.249775   | 8.737217   | 1        | Crude    |
| Shankar 2020      |                                                          | irAEs                                           | 1.097809           | 0.7031316  | 1.714025   | 0.7365   | Crude    |
| Sugano 2020       |                                                          | ILD                                             | 0.617283951        | 0.0862069  | 4.34782609 | 0.63     | Adjusted |
| Suzuki 2020       |                                                          | ILD                                             | 1.727273           | 0.3698708  | 8.066252   | 0.7379   | Crude    |
| Watanabe 2020     |                                                          | ILD                                             | 1.893312           | 0.6299451  | 5.690386   | 0.3435   | Crude    |
| Yamaguchi 2018    |                                                          | Pneumonitis                                     | 2.63               | 0.69       | 17.35      | 0.17     | Crude    |
| Fujita 2019       |                                                          | Stage<br>(xx vs. xx)                            | Infection diseases | 1.263158   | 0.523248   | 3.049354 | 0.669521 |
| Moey 2020         | Inhibitor-Related Cardiotoxicity                         |                                                 | 0.4387464          | 0.1823601  | 1.055595   | 0.0669   | Crude    |
| Okada 2020        | ILD                                                      |                                                 | 0.7212121          | 0.2279308  | 2.282039   | 0.5504   | Crude    |
| Sakata 2019       | Severe irAEs                                             |                                                 | 0.9625             | 0.229889   | 4.029793   | 1        | Crude    |
| Shankar 2020      | irAEs                                                    |                                                 | 4.748858           | 2.004586   | 11.25003   | 0.0001   | Crude    |
| Suzuki 2020       | ILD                                                      |                                                 | 1.083333           | 0.3279005  | 3.579168   | 1        | Crude    |
| Watanabe 2020     | ILD                                                      |                                                 | 4.158416           | 0.5286081  | 32.71312   | 0.1985   | Crude    |
| Suresh 2018       | Surgery                                                  |                                                 | Pneumonitis        | 0.53       | 0.17       | 1.37     | 0.22     |
| Koyama 2019       | Thyroid dysfunction                                      | Immune-related thyroid dysfunction              | 1.93               | 0.48       | 7.78       | 0.355    | Crude    |
| Owen 2018         | TP53 mutation                                            | irAEs                                           | 0.3966667          | 0.1472593  | 1.068486   | 0.101    | Crude    |
| Shankar 2020      | Treatment combination                                    | irAEs                                           | 0.1833333          | 0.0552085  | 0.608803   | 0.0011   | Crude    |
| Chu 2020          |                                                          | Pneumonitis                                     | 0.843              | 0.467      | 1.521      | 0.57     | Crude    |
| Suresh 2018       | Chemotherapy                                             | Pneumonitis                                     | 0.86               | 0.38       | 2          | 0.72     | Crude    |
| Chu 2020          | Treatment line<br>(1 <sup>st</sup> vs ≥2 <sup>nd</sup> ) | Pneumonitis                                     | 0.783085356        | 0.41305246 | 1.4858841  | 0.455    | Crude    |
| Fukihara 2019     |                                                          | Pneumonitis                                     | 2.197              | 0.859      | 5.617      | 0.1      | Crude    |
| Kichenadasse 2020 |                                                          | irAEs                                           | 0.8669551          | 0.5895851  | 1.274814   | 0.505    | Crude    |
| Okada 2020        |                                                          | ILD                                             | 1.362637           | 0.4597171  | 4.038963   | 0.5743   | Crude    |
| Sakata 2019       |                                                          | Severe irAEs                                    | 1.75               | 0.4807723  | 6.369959   | 0.5113   | Crude    |
| Suzuki 2020       |                                                          | ILD                                             | 6.157895           | 0.3692995  | 102.68     | 0.2698   | Crude    |
| Watanabe 2020     |                                                          | ILD                                             | 1.197133           | 0.4565096  | 3.139313   | 0.7974   | Crude    |

|                |                                                        |                                                 |             |            |            |            |          |
|----------------|--------------------------------------------------------|-------------------------------------------------|-------------|------------|------------|------------|----------|
| Yamaguchi 2018 |                                                        | Pneumonitis                                     | 1.29        | 0.34       | 4.09       | 0.68       | Crude    |
| Koyama 2019    | Treatment line (≥3 <sup>rd</sup> line)                 | immune-related thyroid dysfunction              | 1.58        | 0.59       | 4.21       | 0.359      | Crude    |
| Shankar 2020   | Treatment response                                     | irAEs                                           | 3.806452    | 2.60527    | 5.561449   | 0          | Crude    |
| Suzuki 2020    |                                                        | ILD                                             | 2.201058    | 0.8197924  | 5.909615   | 0.1474     | Crude    |
| Koyama 2019    | TTF1 expression                                        | immune-related thyroid dysfunction              | 0.37        | 0.13       | 1.05       | 0.062      | Adjusted |
| Sakata 2019    | Tumor burden                                           | Severe irAEs                                    | 8.625       | 1.960687   | 37.941093  | 0.004592   | Crude    |
| Moey 2020      | Type of lung tumor (NSCLC)                             | Inhibitor-Related Cardiotoxicity                | 0.664557    | 0.177431   | 2.489058   | 0.4653     | Crude    |
| Nishiyama 2019 | UIP radiological                                       | Acute exacerbation of Interstitial lung disease | 1.32        | 0.07       | 25.5       | 0.85       | Adjusted |
| Okada 2020     | Use of EGFR-TKI                                        | ILD                                             | 0.452991453 | 0.02339197 | 8.77229421 | 0.61285302 | Crude    |
| Moey 2020      | Use of alkylating agents                               | Inhibitor-Related Cardiotoxicity                | 2.568345    | 0.5741704  | 11.48857   | 0.2614     | Crude    |
| Moey 2020      | Use of anti-topoisomerase drugs                        | Inhibitor-Related Cardiotoxicity                | 1.042208    | 0.4272149  | 2.542507   | 1          | Crude    |
| Moey 2020      | Use of anti-VEGF drugs                                 | Inhibitor-Related Cardiotoxicity                | 0.252955083 | 0.01454847 | 4.39814372 | 0.35110632 | Crude    |
| Moey 2020      | Use of antimetabolites                                 | Inhibitor-Related Cardiotoxicity                | 1.415441    | 0.5911256  | 3.389252   | 0.4998     | Crude    |
| Moey 2020      | Use of beta-blocker                                    | Inhibitor-Related Cardiotoxicity                | 5.467787    | 2.122235   | 14.08736   | 0.0003     | Crude    |
| Moey 2020      | Use of calcium channel blocker                         | Inhibitor-Related Cardiotoxicity                | 0.8606811   | 0.2748322  | 2.695361   | 1          | Crude    |
| Moey 2020      | Use of loop diuretics                                  | Inhibitor-Related Cardiotoxicity                | 3.860317    | 1.460686   | 10.20209   | 0.009      | Crude    |
| Moey 2020      | Use of renin-angiotensin-aldosterone system inhibitors | Inhibitor-Related Cardiotoxicity                | 0.8943089   | 0.3126544  | 2.55806    | 1          | Crude    |
| Moey 2020      | Use of statins                                         | Inhibitor-Related Cardiotoxicity                | 2.163009    | 0.8999508  | 5.198739   | 0.1043     | Crude    |
| Chu 2020       | Use of steroids                                        | Pneumonitis                                     | 0.729       | 0.362      | 1.467      | 0.375      | Crude    |
| Fujita 2019    |                                                        | Infection diseases                              | 1.905594    | 0.805369   | 4.508851   | 0.15443    | Crude    |
| Moey 2020      |                                                        | Inhibitor-Related Cardiotoxicity                | 6.609836    | 2.339224   | 18.6771    | 0.0002     | Crude    |
| Moey 2020      | Use of taxanes                                         | Inhibitor-Related Cardiotoxicity                | 5.197861    | 1.70758    | 15.82225   | 0.007      | Crude    |
| Moey 2020      | Use of thiazide diuretic                               | Inhibitor-Related Cardiotoxicity                | 1.1475      | 0.3127615  | 4.210096   | 0.7379     | Crude    |
| Fukihara 2019  | White Blood Cell count                                 | Pneumonitis                                     | 1.09        | 1          | 1.188      | 0.051      | Crude    |
| Nakanishi 2019 |                                                        | ILD                                             | 1.00005     | 0.99999    | 1.0002     | 0.062      | Crude    |

PD-L1= Programmed death-ligand 1, NSCLC= Non-small-cell lung carcinoma, irAEs= Immune related adverse events, ALK= Anaplastic lymphoma kinase, COPD= Chronic obstructive pulmonary disease, EGFR= epidermal growth factor receptor, ILD= Interstitial lung disease, CRP= *C-reactive protein*, CT= Computed tomography, ALT= Alanine transaminase, AST= Aspartate transaminase, NLR= neutrophil to lymphocyte ratio, RT= Radiotherapy, TTF1= Transcription Termination Factor 1, LDH= Lactate dehydrogenase, ICI= Immune check-point inhibitors, UIP= Usual interstitial pneumonia, CNS= central nervous system, PLR= Platelet lymphocyte ratio, IAOT= imaging findings of airway obstruction adjacent to lung tumors, CRP= C-reactive protein, EGFR-TKI = Epidermal growth factor receptor tyrosine kinase inhibitors.



**Supplementary Table 2. Random effects meta-analysis. Pooled adjusted odds ratios reflecting the association between risk factors and irAEs in patients treated with ICIs.**

| Risk Factor                                                             | Pooled OR     | LCI          | UCI            | Chi-2       | Chi-2 p value | I2           | P value       | Number of Studies included     | Number of participants |
|-------------------------------------------------------------------------|---------------|--------------|----------------|-------------|---------------|--------------|---------------|--------------------------------|------------------------|
| Age (≥65 vs <65)                                                        | 1.054         | 0.642        | 1.73           | 6.9         | 0.141         | 42.00%       | 0.837         | 5 <sup>[1][2][3][4][5]</sup>   | 777                    |
| <b>Ground glass attenuation (Ground glass attenuation vs normal CT)</b> | <b>77.098</b> | <b>7.818</b> | <b>760.304</b> | <b>0.88</b> | <b>0.349</b>  | <b>0.00%</b> | <b>0.0001</b> | <b>2<sup>[4][6]</sup></b>      | <b>131</b>             |
| <b>Histology (Squamous vs non-squamous)</b>                             | <b>1.847</b>  | <b>1.048</b> | <b>3.256</b>   | <b>1.62</b> | <b>0.445</b>  | <b>0.00%</b> | <b>0.034</b>  | <b>3<sup>[7][5][8]</sup></b>   | <b>536</b>             |
| Performance status (≥2 vs 0-1)                                          | 0.697         | 0.334        | 1.453          | 3.62        | 0.164         | 44.8%        | 0.335         | 3 <sup>[4][5][9]</sup>         | 433                    |
| <b>Smoking pack-years (≥50 vs &lt;50 packs/year)</b>                    | <b>2.662</b>  | <b>1.014</b> | <b>6.989</b>   | <b>0.29</b> | <b>0.59</b>   | <b>0.00%</b> | <b>0.047</b>  | <b>2<sup>[4][9]</sup></b>      | <b>331</b>             |
| Smoking status (Current/former vs never smoker)                         | 0.953         | 0.286        | 3.176          | 0.3         | 0.582         | 0.00%        | 0.938         | 2 <sup>[7][5]</sup>            | 331                    |
| Sex (Male vs female)                                                    | 0.696         | 0.462        | 1.049          | 9.43        | 0.051         | 57.60%       | 0.083         | 5 <sup>[3][7][5][10][11]</sup> | 885                    |

OR= Odds Ratio, LCI= Lower Confidence Interval, UCI= Upper confidence interval

**Supplementary Table 3. Stratified analysis, random effects meta-analysis by type of irAE. Pooled crude and adjusted odds ratios reflecting the association between risk factors and irAEs in patients treated with ICIs.**

| Risk Factor                                                                                              | Type of irAE                     | Pooled OR    | LCI          | UCI           | X2          | X2 p value   | I2           | P value       | Number of studies includes              | Total number of participants |
|----------------------------------------------------------------------------------------------------------|----------------------------------|--------------|--------------|---------------|-------------|--------------|--------------|---------------|-----------------------------------------|------------------------------|
| Age (≥65 vs <65)                                                                                         | Pneumonitis                      | 1.546        | 0.888        | 2.692         | 0.36        | 0.549        | 0.0%         | 0.123         | 3 <sup>[3][10][8]</sup>                 | 625                          |
| Age (≥65 vs <65)                                                                                         | irAEs                            | 1.122        | 0.875        | 1.439         | 3.05        | 0.081        | 67.20%       | 0.363         | 2 <sup>[12][13]</sup>                   | 1295                         |
| COPD (History of COPD vs no history of COPD)                                                             | Interstitial lung disease        | 1.166        | 0.625        | 2.175         | 4.31        | 0.116        | 53.60%       | 0.629         | 3 <sup>[6][9][14]</sup>                 | 323                          |
| Histology (Squamous vs non-squamous)                                                                     | Pneumonitis                      | 1.276        | 0.799        | 38            | 2.05        | 0.36         | 2.2%         | 0.308         | 3 <sup>[3][10][15]</sup>                | 593                          |
| Histology (Squamous vs non-squamous)                                                                     | Interstitial lung disease        | 1.388        | 0.89         | 2.163         | 9.01        | 0.109        | 44.50%       | 0.148         | 6 <sup>[6][7][5][9][14][16]</sup>       | 885                          |
| Histology (Squamous vs non-squamous)                                                                     | irAEs                            | 0.827        | 0.693        | 0.985         | 0.29        | 0.867        | 0.00%        | 0.033         | 3 <sup>[13][17][18]</sup>               | 3181                         |
| Pembrolizumab treatment (Pembrolizumab treatment vs other ICIs)                                          | Pneumonitis                      | 1.841        | 0.866        | 3.913         | 6.46        | 0.011        | 84.50%       | 0.113         | 2 <sup>[15][8]</sup>                    | 375                          |
| LDH (≥240 vs <240 U/L)                                                                                   | Interstitial lung disease        | 1            | 0.999        | 1.001         | 2.36        | 0.124        | 57.60%       | 0.754         | 2 <sup>[6][7]</sup>                     | 284                          |
| Performance status (≥2 vs 0-1)                                                                           | Pneumonitis                      | 0.973        | 0.441        | 2.146         | 3.21        | 0.201        | 37.6%        | 0.946         | 3 <sup>[3][10][15]</sup>                | 593                          |
| Performance status (≥2 vs 0-1)                                                                           | Interstitial lung disease        | 1.309        | 0.773        | 2.217         | 3.80        | 0.578        | 0.0%         | 0.316         | 6 <sup>[6][7][5][9][14][16]</sup>       | 883                          |
| <b>Performance status (≥2 vs 0-1)</b>                                                                    | <b>Severe irAEs</b>              | <b>4.274</b> | <b>1.215</b> | <b>14.925</b> | <b>0.00</b> | <b>0.953</b> | <b>0.0%</b>  | <b>0.024</b>  | <b>2<sup>[9][19]</sup></b>              | <b>144</b>                   |
| <b>Performance status (≥2 vs 0-1)</b>                                                                    | <b>irAEs</b>                     | <b>0.598</b> | <b>0.449</b> | <b>0.797</b>  | <b>3.84</b> | <b>0.279</b> | <b>21.8%</b> | <b>0.0001</b> | <b>4<sup>[12][13][17][18]</sup></b>     | <b>3466</b>                  |
| PD-L1 expression (≥50% vs. <50%)                                                                         | Interstitial lung disease        | 1.898        | 0.92         | 3.913         | 0.17        | 0.918        | 0.00%        | 0.083         | 3 <sup>[9][14][16]</sup>                | 471                          |
| Previous radiation pneumonitis (History of radiation pneumonitis vs no history of radiation pneumonitis) | Interstitial lung disease        | 2.584        | 0.971        | 6.877         | 3.52        | 0.061        | 71.60%       | 0.057         | 2 <sup>[6][7]</sup>                     | 284                          |
| Radiotherapy (Previous radiotherapy vs no radiotherapy)                                                  | Interstitial lung disease        | 1.114        | 0.556        | 2.232         | 1.16        | 0.56         | 0.00%        | 0.761         | 3 <sup>[6][5][9]</sup>                  | 315                          |
| Smoking status (Current/former vs never smoker)                                                          | Pneumonitis                      | 1.546        | 0.885        | 2.7           | 0.47        | 0.491        | 0.00%        | 0.126         | 2 <sup>[3][10]</sup>                    | 423                          |
| Smoking status (Current/former vs never smoker)                                                          | Interstitial lung disease        | 1.584        | 0.797        | 3.147         | 1.68        | 0.794        | 0.00%        | 0.189         | 5 <sup>[6][7][5][14][16]</sup>          | 783                          |
| Smoking status (Current/former vs never smoker)                                                          | irAEs                            | 1.113        | 0.868        | 1.428         | 0.01        | 0.941        | 0.00%        | 0.397         | 2 <sup>[17][18]</sup>                   | 2171                         |
| Sex (Male vs female)                                                                                     | Pneumonitis                      | 0.793        | 0.427        | 1.475         | 1.97        | 0.374        | 0.00%        | 0.464         | 3 <sup>[3][10][15]</sup>                | 593                          |
| <b>Sex (Male vs female)</b>                                                                              | <b>Interstitial lung disease</b> | <b>1.79</b>  | <b>1.054</b> | <b>3.041</b>  | <b>3.45</b> | <b>0.631</b> | <b>0.00%</b> | <b>0.031</b>  | <b>6<sup>[6][7][5][9][14][16]</sup></b> | <b>885</b>                   |

|                                                |                           |              |              |              |             |              |              |              |                                |            |
|------------------------------------------------|---------------------------|--------------|--------------|--------------|-------------|--------------|--------------|--------------|--------------------------------|------------|
| Sex<br>(Male vs female)                        | irAEs                     | 0.967        | 0.832        | 1.124        | 7.68        | 0.053        | 61.00%       | 0.66         | 4 <sup>[11]</sup> [13][17][18] | 3412       |
| Sex<br>(Male vs female)                        | Severe irAEs              | 0.723        | 0.365        | 1.433        | 0.41        | 0.522        | 0.00%        | 0.353        | 2 <sup>[11]</sup> [19]         | 273        |
| <b>Sex<br/>(Male vs female)</b>                | <b>Skin reactions</b>     | <b>2.351</b> | <b>1.159</b> | <b>4.769</b> | <b>1.33</b> | <b>0.248</b> | <b>24.9%</b> | <b>0.018</b> | <b>2<sup>[11]</sup>[20]</b>    | <b>386</b> |
| Stage<br>(Stage III/IV vs I/II)                | Interstitial lung disease | 1.089        | 0.505        | 2.352        | 2.11        | 0.348        | 5.30%        | 0.827        | 3 <sup>[9]</sup> [16][14]      | 471        |
| Treatment line<br>(First vs second/third line) | Pneumonitis               | 1.115        | 0.686        | 1.815        | 3.23        | 0.199        | 38.00%       | 0.66         | 3 <sup>[9]</sup> [10][15]      | 590        |
| Treatment line<br>(First vs second/third line) | Interstitial lung disease | 1.397        | 0.695        | 2.809        | 1.17        | 0.558        | 0.00%        | 0.348        | 3 <sup>[9]</sup> [14][16]      | 471        |

OR= Odds Ratio, LCI= Lower Confidence Interval, UCI= Upper confidence interval, COPD=Chronic Obstructive Pulmonary Disease, PD-L1=Programmed Death-ligand 1, LDH= Lactate dehydrogenase, U/L=Units per liter, mg/dL= milligrams per deciliter.

**Supplementary Table 4. Stratified analysis, random effects meta-analysis by quality/risk of bias. Pooled crude and adjusted odds ratios reflecting the association between risk factors and irAEs in patients treated with ICIs.**

| Risk Factor                                                                                              | Quality/risk of bias                   | Pooled OR | LCI   | UCI   | Chi-2 | Chi-2 p value | I2     | P value | Number of studies includes | Total number of participants |
|----------------------------------------------------------------------------------------------------------|----------------------------------------|-----------|-------|-------|-------|---------------|--------|---------|----------------------------|------------------------------|
| LDH (≥240 vs <240 U/L)                                                                                   | Moderate quality/Moderate risk of bias | 1         | 0.999 | 1.001 | 4.04  | 0.132         | 50.50% | 0.753   | 3 <sup>[6][7][10]</sup>    | 407                          |
| Pembrolizumab treatment (Pembrolizumab treatment vs other ICIs)                                          | High quality/Low risk of bias          | 1.841     | 0.866 | 3.913 | 6.46  | 0.011         | 84.50% | 0.113   | 2 <sup>[8][15]</sup>       | 375                          |
| Previous radiation pneumonitis (History of radiation pneumonitis vs no history of radiation pneumonitis) | Moderate quality/Moderate risk of bias | 2.584     | 0.971 | 6.877 | 3.52  | 0.061         | 71.60% | 0.057   | 2 <sup>[6][7]</sup>        | 284                          |
| Stage (Stage III/IV vs I/II)                                                                             | Low quality/High risk of bias          | 1.38      | 0.784 | 2.428 | 14.67 | 0.001         | 86.40% | 0.265   | 3[21] <sup>[19][18]</sup>  | 861                          |
| Stage (Stage III/IV vs I/II)                                                                             | Moderate quality/Moderate risk of bias | 1.365     | 0.698 | 2.67  | 1.29  | 0.524         | 0.00%  | 0.363   | 3 <sup>[14][2][16]</sup>   | 536                          |
| Combination treatment (ICI + chemotherapy vs monotherapy)                                                | High quality/Low risk of bias          | 0.849     | 0.525 | 1.373 | 0     | 0.969         | 0.00%  | 0.504   | 2 <sup>[6][3]</sup>        | 505                          |

OR= Odds Ratio, LCI= Lower Confidence Interval, UCI= Upper confidence interval, COPD=Chronic Obstructive Pulmonary Disease, ILD= Interstitial lung disease, PD-L1=Programmed Death-ligand 1, LDH= Lactate dehydrogenase, U/L=Units per liter, mg/dL= milligrams per deciliter.

**Supplementary Table 5. Stratified analysis, random effects meta-analysis by region. Pooled odds ratios of Crude and adjusted odds ratios reflecting the association between risk factors and irAEs in patients treated with ICIs.**

| Risk Factor                                                                                              | Region      | Pooled OR    | LCI         | UCI          | Chi-2       | Chi-2 p value | I2            | P value      | Number of studies includes      | Total number of participants |
|----------------------------------------------------------------------------------------------------------|-------------|--------------|-------------|--------------|-------------|---------------|---------------|--------------|---------------------------------|------------------------------|
| LDH (≥240 vs <240 U/L)                                                                                   | Asia        | 1            | 0.999       | 1.001        | 4.04        | 0.132         | 50.50%        | 0.753        | 3 <sup>[7][6][10]</sup>         | 407                          |
| <b>Pembrolizumab treatment (Pembrolizumab treatment vs other ICIs)</b>                                   | <b>Asia</b> | <b>1.973</b> | <b>1.12</b> | <b>3.476</b> | <b>3.88</b> | <b>0.143</b>  | <b>48.50%</b> | <b>0.019</b> | <b>3<sup>[15][19][16]</sup></b> | <b>443</b>                   |
| Previous radiation pneumonitis (History of radiation pneumonitis vs no history of radiation pneumonitis) | Asia        | 2.584        | 0.971       | 6.877        | 3.52        | 0.061         | 71.60%        | 0.057        | 2 <sup>[7][6]</sup>             | 284                          |
| Stage (Stage III/IV vs I/II)                                                                             | USA         | 1.474        | 0.797       | 2.728        | 14.39       | 0             | 93.00%        | 0.216        | 2[21] <sup>[18]</sup>           | 819                          |
| Stage (Stage III/IV vs I/II)                                                                             | Asia        | 1.131        | 0.661       | 1.936        | 2.23        | 0.693         | 0.00%         | 0.653        | 5 <sup>[2][9][19][14][16]</sup> | 680                          |
| Combination treatment (ICI + chemotherapy vs monotherapy)                                                | USA         | 0.521        | 0.263       | 1.032        | 4.31        | 0.038         | 76.80%        | 0.062        | 2 <sup>[8][18]</sup>            | 828                          |
| Use of steroids (Previous use of steroids vs no previous use of steroids)                                | Asia        | 1.068        | 0.621       | 1.839        | 2.88        | 0.09          | 65.30%        | 0.812        | 2 <sup>[2][3]</sup>             | 467                          |
| White Blood Cell count (≥10 <sup>3</sup> vs <10 <sup>3</sup> /mm <sup>3</sup> )                          | Asia        | 1            | 1           | 1            | 3.84        | 0.05          | 74.00%        | 0.35         | 2 <sup>[15][6]</sup>            | 253                          |

OR= Odds Ratio, LCI= Lower Confidence Interval, UCI= Upper confidence interval, CRP= C-Reactive protein

**Supplementary Table 6. Risk factors for developing common irAEs. Crude and adjusted odds ratios reflecting the association between risk factors and irAEs in patients treated with ICIs.**

| Author/Year     | Risk factor                                                                                                         | Type of irAE                        | OR          | LCI         | UCI         | P value      | Type of analysis |
|-----------------|---------------------------------------------------------------------------------------------------------------------|-------------------------------------|-------------|-------------|-------------|--------------|------------------|
| Aso 2020        | Preexisting anti-nuclear antibodies (Preexisting anti-nuclear antibodies vs no preexisting anti-nuclear antibodies) | Skin reactions                      | 1.96195     | 0.9737474   | 3.953025    | 0.0696       | Crude            |
| Aso 2020        | Preexisting anti-thyroid antibodies (Preexisting anti-thyroid antibodies vs no preexisting anti-thyroid antibodies) | Skin reactions                      | 2.029825    | 0.8814161   | 4.674509    | 0.1196       | Crude            |
| Metro 2020      | Brain metastasis (Brain metastasis vs no brain metastasis)                                                          | Acute respiratory distress syndrome | 0.43756146  | 0.02321661  | 8.24668435  | 0.59321383   | Crude            |
| Metro 2020      | Brain metastasis (Brain metastasis vs no brain metastasis)                                                          | Adrenal insufficiency               | 1.33038348  | 0.05347961  | 33.0952368  | 0.87159408   | Crude            |
| Metro 2020      | Brain metastasis (Brain metastasis vs no brain metastasis)                                                          | Colitis                             | 2.055556    | 0.1809565   | 14.72148    | 0.3411       | Crude            |
| Metro 2020      | Brain metastasis (Brain metastasis vs no brain metastasis)                                                          | Hepatitis                           | 8.222222    | 0.4164521   | 487.1336    | 0.1036       | Crude            |
| Metro 2020      | Brain metastasis (Brain metastasis vs no brain metastasis)                                                          | Mucositis                           | 11.9734513  | 0.48131645  | 297.857132  | 0.13013106   | Crude            |
| Metro 2020      | Brain metastasis (Brain metastasis vs no brain metastasis)                                                          | Myocarditis                         | 1.33038348  | 0.05347961  | 33.0952368  | 0.87159408   | Crude            |
| Metro 2020      | Brain metastasis (Brain metastasis vs no brain metastasis)                                                          | Myositis                            | 0.79469027  | 0.0376206   | 16.7868846  | 0.89141954   | Crude            |
| Metro 2020      | Brain metastasis (Brain metastasis vs no brain metastasis)                                                          | Peripheral neuropathy               | 1.33038348  | 0.05347961  | 33.0952368  | 0.87159408   | Crude            |
| Metro 2020      | Brain metastasis (Brain metastasis vs no brain metastasis)                                                          | Skin rash                           | 1.33038348  | 0.05347961  | 33.0952368  | 0.87159408   | Crude            |
| Metro 2020      | Brain metastasis (Brain metastasis vs no brain metastasis)                                                          | Toxic epidermal necrolysis          | 1.33038348  | 0.05347961  | 33.0952368  | 0.87159408   | Crude            |
| Zeng 2020       | CCI (<1 vs ≥1)                                                                                                      | Colitis                             | 0.35526316  | 0.00934471  | 6.06646672  | 0.39187828   | Crude            |
| Zeng 2020       | CCI (<1 vs ≥1)                                                                                                      | Hepatitis                           | 0.3513514   | 0.0058017   | 7.192269    | 0.5698       | Crude            |
| Zeng 2020       | CCI (<1 vs ≥1)                                                                                                      | Hypothyroidism                      | 0.2252252   | 0.0041798   | 3.053743    | 0.3036       | Crude            |
| Zeng 2020       | CCI (<1 vs ≥1)                                                                                                      | Pneumonitis                         | 0.7142857   | 0.0886452   | 5.811392    | 0.6929       | Crude            |
| Zeng 2020       | CCI (<1 vs ≥1)                                                                                                      | Skin rash                           | 4.090909    | 0.4136998   | 200.4955    | 0.2303       | Crude            |
| Aso 2020        | ECOG Performance status (≥2 vs 0-1)                                                                                 | Skin reactions                      | 0.4803922   | 0.06571     | 3.512045    | 0.5985       | Crude            |
| Aso 2020        | Histology                                                                                                           | Skin reactions                      | 1.121528    | 0.5587607   | 2.251097    | 0.8584       | Crude            |
| Aso 2020        | PD-L1 (≥1% vs <1%)                                                                                                  | Skin reactions                      | 2.3         | 0.696761    | 7.592269    | 0.191796     | Crude            |
| <b>Aso 2020</b> | <b>Preexisting rheumatoid factor</b>                                                                                | <b>Skin reactions</b>               | <b>3.41</b> | <b>1.58</b> | <b>7.36</b> | <b>0.002</b> | <b>Adjusted</b>  |
| Zeng 2020       | SCS (<8 vs ≥8)                                                                                                      | Colitis                             | 1.25        | 0.07406568  | 48.1721239  | 0.71349524   | Crude            |
| Zeng 2020       | SCS (<8 vs ≥8)                                                                                                      | Hepatitis                           | 1.230769    | 0.0607903   | 75.58945    | 1            | Crude            |
| Zeng 2020       | SCS (<8 vs ≥8)                                                                                                      | Hypothyroidism                      | 0.5897436   | 0.0405429   | 8.718642    | 0.6302       | Crude            |

|                  |                             |                         |                  |                  |                  |               |              |
|------------------|-----------------------------|-------------------------|------------------|------------------|------------------|---------------|--------------|
| Zeng 2020        | SCS (<8 vs ≥8)              | Pneumonitis             | 3.333333         | 0.3366566        | 164.0923         | 0.3958        | Crude        |
| Zeng 2020        | SCS (<8 vs ≥8)              | Skin reactions          | 0.5789474        | 0.0718143        | 4.74271          | 0.6656        | Crude        |
| Duma 2019        | Sex (Male vs female)        | Arthralgia              | 0.2090909        | 0.0043817        | 1.921812         | 0.2148        | Crude        |
| Duma 2019        | Sex (Male vs female)        | Colitis                 | 1.084112         | 0.1967044        | 5.97113          | 1             | Crude        |
| <b>Duma 2019</b> | <b>Sex (Male vs female)</b> | <b>Endocrinopathies</b> | <b>0.1154062</b> | <b>0.0127169</b> | <b>0.5094497</b> | <b>0.0006</b> | <b>Crude</b> |
| Duma 2019        | Sex (Male vs female)        | Hepatitis               | 0.4484127        | 0.0732122        | 2.033137         | 0.3367        | Crude        |
| <b>Duma 2019</b> | <b>Sex (Male vs female)</b> | <b>Skin reactions</b>   | <b>4.53125</b>   | <b>1.374495</b>  | <b>19.26319</b>  | <b>0.0071</b> | <b>Crude</b> |
| Aso 2020         | Sex (Male vs female)        | Skin reactions          | 1.804444         | 0.7806822        | 4.170736         | 0.2328        | Crude        |
| Aso 2020         | Smoking (Ever vs never)     | Skin reactions          | 1.89759          | 0.7142208        | 5.041647         | 0.2607        | Crude        |

OR= Odds Ratio, LCI= Lower Confidence Interval, UCI= Upper confidence interval, CCI= Charlson comorbidity index, SCS= Simplified comorbidity score

## References

- [1] Koyama J, Horiike A, Yoshizawa T, Dotsu Y, Ariyasu R, Saiki M, et al. Correlation between thyroid transcription factor-1 expression, immune-related thyroid dysfunction, and efficacy of anti-programmed cell death protein-1 treatment in non-small cell lung cancer. *J Thorac Dis* 2019;11:1919–28. <https://doi.org/10.21037/jtd.2019.04.102>.
- [2] Fujita K, Kim YH, Kanai O, Yoshida H, Mio T, Hirai T. Emerging concerns of infectious diseases in lung cancer patients receiving immune checkpoint inhibitor therapy. *Respir Med* 2019;146:66–70. <https://doi.org/10.1016/j.rmed.2018.11.021>.
- [3] Chu X, Zhao J, Zhou J, Zhou F, Jiang T, Jiang S, et al. Association of baseline peripheral-blood eosinophil count with immune checkpoint inhibitor-related pneumonitis and clinical outcomes in patients with non-small cell lung cancer receiving immune checkpoint inhibitors. *Lung Cancer* 2020;150:76–82. <https://doi.org/10.1016/j.lungcan.2020.08.015>.
- [4] Nishiyama N, Honda T, Sema M, Kawahara T, Jin Y, Natsume I, et al. The utility of ground-glass attenuation score for anticancer treatment-related acute exacerbation of interstitial lung disease among lung cancer patients with interstitial lung disease. *Int J Clin Oncol* 2020;25:282–91. <https://doi.org/10.1007/s10147-019-01576-x>.
- [5] Sugano T, Seike M, Saito Y, Kashiwada T, Terasaki Y, Takano N, et al. Immune checkpoint inhibitor-associated interstitial lung diseases correlate with better prognosis in patients with advanced non-small-cell lung cancer. *Thorac Cancer* 2020;11:1052–60. <https://doi.org/10.1111/1759-7714.13364>.
- [6] Nakanishi Y, Masuda T, Yamaguchi K, Sakamoto S, Horimasu Y, Nakashima T, et al. Pre-existing interstitial lung abnormalities are risk factors for immune checkpoint inhibitor-induced interstitial lung disease in non-small cell lung cancer. *Respir Investig* 2019;57:451–9. <https://doi.org/10.1016/j.resinv.2019.05.002>.
- [7] Nakahama K, Tamiya A, Isa S-I, Taniguchi Y, Shiroyama T, Suzuki H, et al. Association Between Imaging Findings of Airway Obstruction Adjacent to Lung Tumors and the Onset of Interstitial Lung Disease After Nivolumab. *In Vivo* 2018;32:887–91. <https://doi.org/10.21873/invivo.11324>.
- [8] Suresh K, Voong KR, Shankar B, Forde PM, Ettinger DS, Marrone KA, et al. Pneumonitis in Non-Small Cell Lung Cancer Patients Receiving Immune Checkpoint Immunotherapy: Incidence and Risk Factors. *J Thorac Oncol* 2018;13:1930–1939. <https://doi.org/10.1016/j.jtho.2018.08.2035>.
- [9] Okada N, Matsuoka R, Sakurada T, Goda M, Chuma M, Yagi K, et al. Risk factors of immune checkpoint inhibitor-related interstitial lung disease in patients with lung cancer: a single-institution retrospective study. *Sci Rep* 2020;10:1–9. <https://doi.org/10.1038/s41598-020-70743-2>.
- [10] Yamaguchi T, Shimizu J, Hasegawa T, Horio Y, Inaba Y, Yatabe Y, et al. Pre-existing pulmonary fibrosis is a risk factor for anti-PD-1-related pneumonitis in patients with non-small cell lung cancer: A retrospective analysis. *Lung Cancer* 2018;125:212–7. <https://doi.org/10.1016/j.lungcan.2018.10.001>.
- [11] Duma N, Abdel-Ghani A, Yadav S, Hoversten KP, Reed CT, Sitek AN, et al. Sex Differences in Tolerability to Anti-



Programmed Cell Death Protein 1 Therapy in Patients with Metastatic Melanoma and Non-Small Cell Lung Cancer: Are We All Equal? *Oncologist* 2019;24:e1148–55. <https://doi.org/10.1634/theoncologist.2019-0094>.

- [12] Ahmed T, Lycan T, Dothard A, Ehrlichman P, Ruiz J, Farris M, et al. Performance Status and Age as Predictors of Immunotherapy Outcomes in Advanced Non–Small-Cell Lung Cancer. *Clin Lung Cancer* 2020;21:e286–93. <https://doi.org/10.1016/j.clc.2020.01.001>.
- [13] Cortellini A, Friedlaender A, Banna GL, Porzio G, Bersanelli M, Cappuzzo F, et al. Immune-related Adverse Events of Pembrolizumab in a Large Real-world Cohort of Patients With NSCLC With a PD-L1 Expression  $\geq$  50% and Their Relationship With Clinical Outcomes. *Clin Lung Cancer* 2020;21:498-508.e2. <https://doi.org/10.1016/j.clc.2020.06.010>.
- [14] Suzuki Y, Karayama M, Uto T, Fujii M, Matsui T, Asada K, et al. Assessment of Immune-Related Interstitial Lung Disease in Patients With NSCLC Treated with Immune Checkpoint Inhibitors: A Multicenter Prospective Study. *J Thorac Oncol* 2020;15:1317–27. <https://doi.org/10.1016/j.jtho.2020.04.002>.
- [15] Fukihara J, Sakamoto K, Koyama J, Ito T, Iwano S, Morise M, et al. Prognostic Impact and Risk Factors of Immune-Related Pneumonitis in Patients With Non-Small-Cell Lung Cancer Who Received Programmed Death 1 Inhibitors. *Clin Lung Cancer* 2019;20:442-450.e4. <https://doi.org/10.1016/j.clc.2019.07.006>.
- [16] Watanabe S, Ota T, Hayashi M, Ishikawa H, Otsubo A, Shoji S, et al. Prognostic significance of the radiologic features of pneumonitis induced by anti-PD-1 therapy. *Cancer Med* 2020;9:3070–7. <https://doi.org/10.1002/cam4.2974>.
- [17] Kichenadasse G, Miners JO, Mangoni AA, Rowland A, Hopkins AM, Sorich MJ. Multiorgan immune-related adverse events during treatment with atezolizumab. *JNCCN J Natl Compr Cancer Netw* 2020;18:1191–9. <https://doi.org/10.6004/jnccn.2020.7567>.
- [18] Shankar B, Zhang J, Naqash AR, Forde PM, Feliciano JL, Marrone KA, et al. Multisystem Immune-Related Adverse Events Associated with Immune Checkpoint Inhibitors for Treatment of Non-Small Cell Lung Cancer. *JAMA Oncol* 2020;1–6. <https://doi.org/10.1001/jamaoncol.2020.5012>.
- [19] Sakata Y, Kawamura K, Ichikado K, Shingu N, Yasuda Y, Eguchi Y, et al. The association between tumor burden and severe immune-related adverse events in non-small cell lung cancer patients responding to immune-checkpoint inhibitor treatment. *Lung Cancer* 2019;130:159–61. <https://doi.org/10.1016/j.lungcan.2019.02.011>.
- [20] Aso M, Toi Y, Sugisaka J, Aiba T, Kawana S, Saito R, et al. Association Between Skin reactions and Clinical Benefit in Patients Treated with Anti-Programmed Cell Death 1 Monotherapy for Advanced Non-Small Cell Lung Cancer. *Oncologist* 2020;25:e536–44. <https://doi.org/10.1634/theoncologist.2019-0550>.
- [21] Moey MYY, Tomdio AN, McCallen JD, Vaughan LM, O'Brien K, Naqash AR, et al. Characterization of Immune Checkpoint Inhibitor-Related Cardiotoxicity in Lung Cancer Patients From a Rural Setting. *JACC CardioOncology* 2020;2:491–502. <https://doi.org/10.1016/j.jacc.2020.07.005>.
